# Supplementary material
Source: Research Square preprint supplement (doi:10.21203/rs.3.rs-9373918/v1)
Supplement: Supplementary file 1 [file 7dc34e1930945500673fd9b5.docx]

**Supplementary material**

Supplementary Table 1 Comparison of circulating MAIT cell subsets between HCs and patients with RA

| MAIT cell subsets | HCs | | | RA | *P-*value |
| --- | --- | --- | --- | --- | --- |
| CD3+ MAIT / CD3+ T cells | 1.8 (0.8-3.5) | 0.5 (0.2-1.8) | | | ＜0.01 |
| CD3+ MAIT / lymphocytes | 1.0 (0.5-2.1) | 0.2 (0.1-0.9) | | | ＜0.001 |
| CD8+ MAIT / CD8+ T cells | 3.4 (1.1-5.0) | 1.4 (0.4-2.7) | | | ＜0.01 |
| CD8+ MAIT / CD3+ T cells | 0.9 (0.3-1.8) | 0.3 (0.1-0.8) | | | ＜0.01 |
| CD8+ MAIT / lymphocytes | 0.6 (0.2-0.9) | 0.09 (0.04-0.43) | | | ＜0.01 |
| CD4+ MAIT / CD4+ T cells | 0.07 (0.04-0.10) | | 0.06 (0.03-0.17) | | 1.00 |
| CD4+ MAIT / CD3+ T cells | 0.04 (0.02-0.06) | 0.03 (0.01-0.07) | | | 0.50 |
| CD4+ MAIT / lymphocytes | 0.02 (0.01-0.03) | 0.013(0.008-0.021) | | | 0.06 |

Data are presented as median (IQR). Differences between groups were analysed using the Mann–Whitney U test. RA: rheumatoid arthritis; HCs: healthy controls; MAIT: mucosal-associated invariant T.

Supplementary Table 2 Correlation between MAIT cell subsets and disease activity

| Disease activity | CD3+ MAIT / CD3+ T cells | | CD3+ MAIT / lymphocytes | | CD8+ MAIT / CD8+ T cells | | CD8+ MAIT / CD3+ T cells | | CD8+ MAIT / lymphocytes | |
| --- | --- | --- | --- | --- | --- | --- | --- | --- | --- | --- |
| r | *P* | r | *P* | r | *P* | r | *P* | r | *P* |
| DJC | -0.031 | 0.887 | -0.112 | 0.602 | -0.032 | 0.884 | 0.072 | 0.738 | -0.032 | 0.883 |
| TJC | 0.018 | 0.935 | -0.055 | 0.797 | -0.032 | 0.882 | 0.002 | 0.994 | -0.081 | 0.706 |
| SJC | -0.047 | 0.829 | -0.044 | 0.837 | -0.106 | 0.621 | -0.126 | 0.559 | -0.106 | 0.622 |
| ESR | -0.082 | 0.704 | -0.134 | 0.533 | 0.070 | 0.743 | -0.026 | 0.904 | -0.078 | 0.716 |
| DAS28.ESR | -0.040 | 0.853 | -0.144 | 0.501 | -0.098 | 0.648 | -0.099 | 0.645 | -0.188 | 0.379 |
| CRP | -0.088 | 0.710 | -0.124 | 0.563 | -0.023 | 0.913 | -0.004 | 0.984 | -0.001 | 0.997 |
| DAS28.CRP | -0.027 | 0.902 | -0.099 | 0.645 | -0.085 | 0.694 | -0.062 | 0.774 | -0.118 | 0.582 |
| CCP | -0.278 | 0.189 | -0.320 | 0.127 | -0.253 | 0.234 | -0.357 | 0.087 | -0.390 | 0.059 |
| RF | -0.151 | 0.482 | -0.151 | 0.351 | -0.223 | 0.294 | -0.140 | 0.515 | -0.134 | 0.531 |
| LBP | 0.381 | 0.097 | 0.340 | 0.143 | 0.146 | 0.539 | 0.298 | 0.202 | 0.250 | 0.289 |
| sCD14 | 0.176 | 0.458 | 0.050 | 0.835 | 0.002 | 0.992 | 0.164 | 0.490 | 0.141 | 0.552 |

Data are presented as median (IQR). Spearman’s rank correlation analysis was used to assess associations between circulating MAIT cell subsets and clinical parameters. RA: rheumatoid arthritis; MAIT: mucosal-associated invariant T; DAS28: Disease Activity Score in 28 joints; ESR: erythrocyte sedimentation rate; CRP: C-reactive protein; RF: rheumatoid factor; CCP: cyclic citrullinated peptide; LBP: lipopolysaccharide-binding protein; sCD14: soluble CD14.

Supplementary Table 3 Correlation between MAIT cell subsets and medication usage in patients with RA

| Medication usage | CD3+ MAIT / lymphocytes | | CD3+ MAIT / lymphocytes | | CD8+ MAIT / CD8+ T cells | | CD8+ MAIT / CD3+ T cells | | CD8+ MAIT / lymphocytes | |
| --- | --- | --- | --- | --- | --- | --- | --- | --- | --- | --- |
| r | *P* | r | *P* | r | *P* | r | *P* | r | *P* |
| MTX | -0.139 | 0.517 | -0.167 | 0.435 | -0.337 | 0.107 | -0.372 | 0.073 | -0.332 | 0.113 |
| LEF | -0.030 | 0.889 | -0.104 | 0.630 | -0.270 | 0.202 | -0.275 | 0.194 | -0.266 | 0.209 |
| HCQ | 0.123 | 0.568 | 0.035 | 0.869 | -0.113 | 0.598 | -0.099 | 0.645 | -0.119 | 0.580 |
| SASP | 0.026 | 0.904 | -0.042 | 0.846 | -0.241 | 0.256 | -0.176 | 0.412 | -0.180 | 0.400 |
| Iguratimod | 0.073 | 0.735 | -0.028 | 0.898 | -0.164 | 0.443 | -0.178 | 0.405 | -0.203 | 0.341 |
| DMARDs | -0.006 | 0.977 | -0.106 | 0.623 | -0.249 | 0.241 | -0.255 | 0.229 | -0.280 | 0.186 |
| Biologicals | -0.258 | 0.223 | -0.166 | 0.440 | -0.119 | 0.579 | -0.285 | 0.177 | -0.192 | 0.369 |
| Steroid | 0.049 | 0.821 | 0 | 1 | -0.165 | 0.441 | -0.073 | 0.734 | -0.110 | 0.609 |
| NSAIDs | -0.236 | 0.268 | -0.175 | 0.413 | -0.465 | 0.022 | -0.368 | 0.076 | -0.248 | 0.243 |
| Herb | -0.282 | 0.182 | -0.304 | 0.149 | -0.252 | 0.235 | -0.259 | 0.221 | -0.274 | 0.195 |

Data are presented as median (IQR). Spearman’s rank correlation analysis was performed to assess the associations between MAIT cell subsets and medication usage. Correlation coefficients (r) and corresponding *P* values are shown. MTX: methotrexate; LEF: leflunomide; HCQ: hydroxychloroquine; SASP: sulfasalazine; DMARDs: disease-modifying anti-rheumatic drugs; NSAIDs: non-steroidal anti-inflammatory drugs.


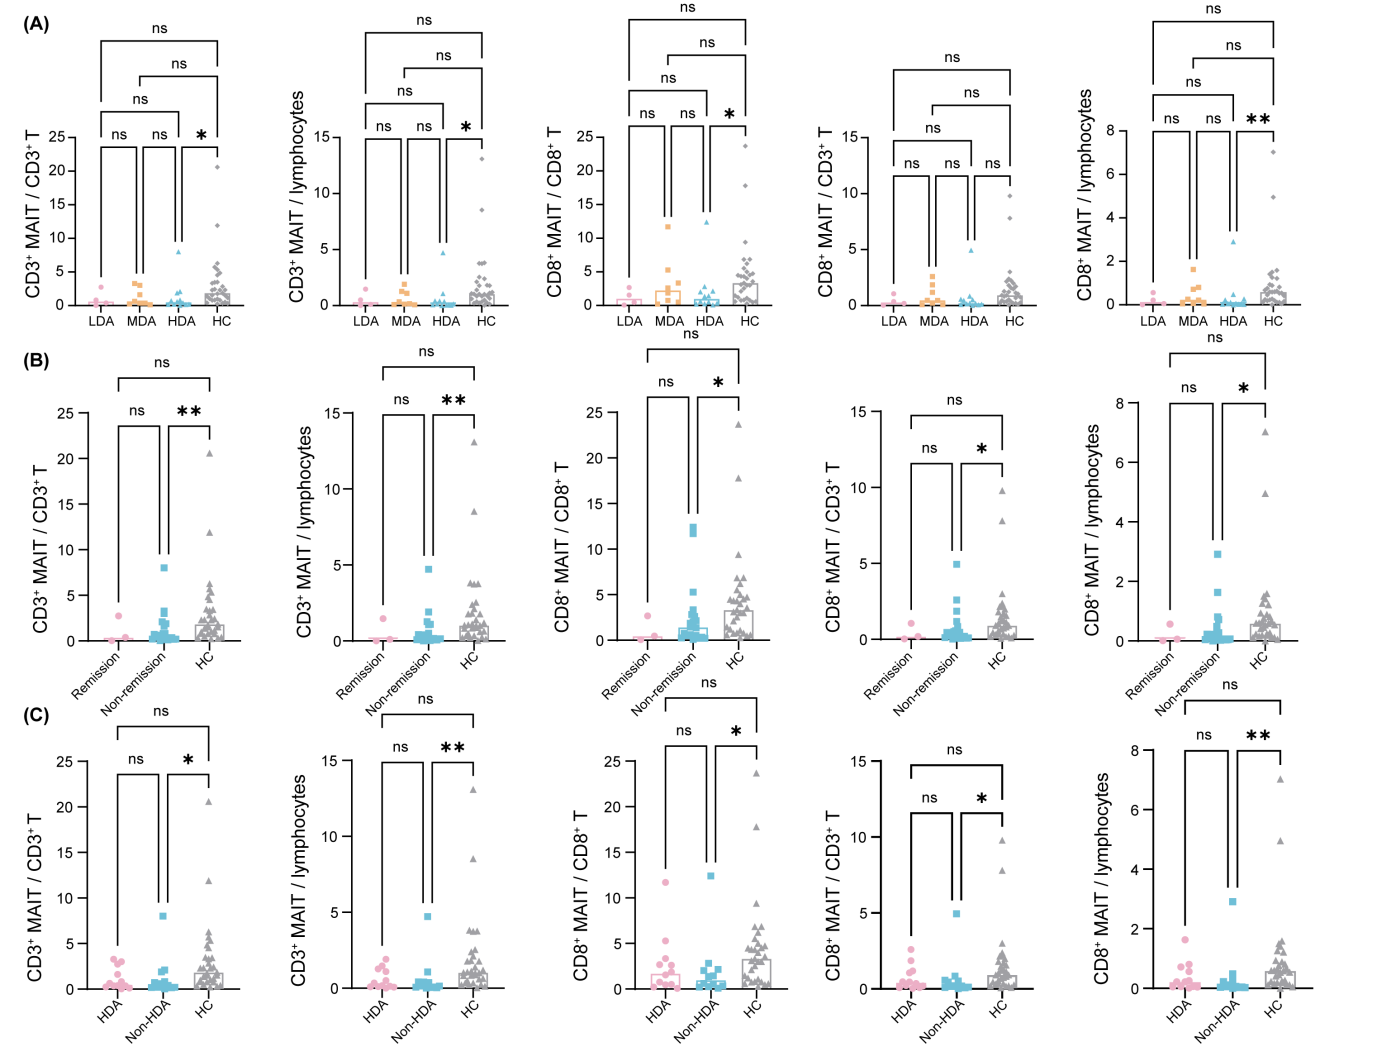


Supplementary Figure 1 Circulating MAIT cell subsets across different disease activity stratifications in RA. MAIT cell frequencies were analysed in RA patients stratified according to different DAS28-ESR-based classifications and compared with healthy controls. Each symbol represents an individual subject. Group comparisons were performed using a Kruskal–Wallis test followed by Dunn’s multiple comparisons test, with pairwise comparisons indicated. ns: not significant; **P* < 0.05, ***P* < 0.01.


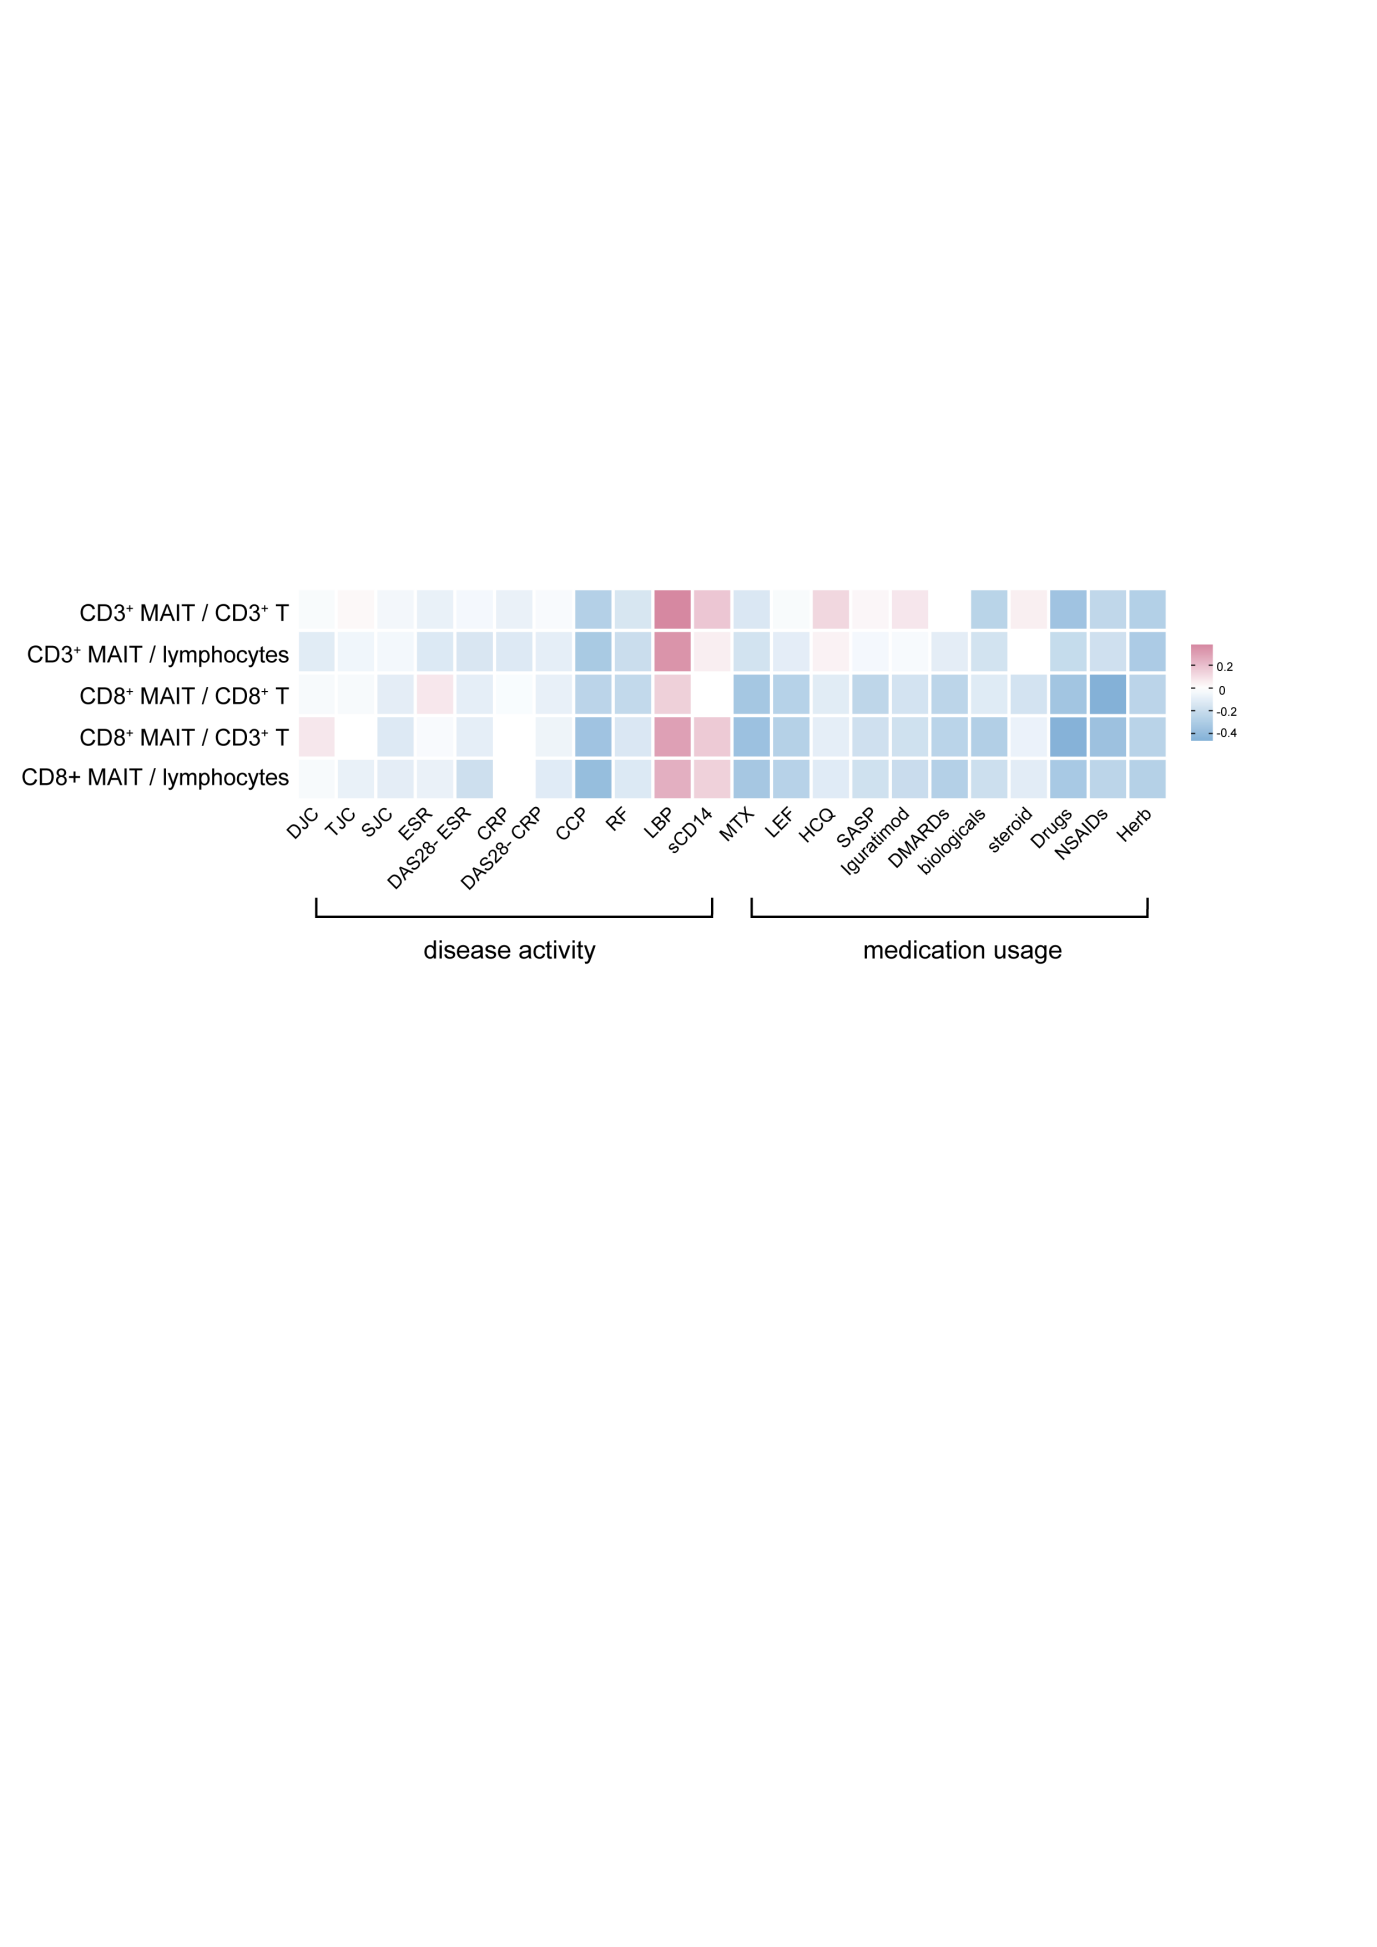


Supplementary Figure 2 Correlation between MAIT cell subsets and disease activity parameters in RA. Heatmap showing Spearman correlations between circulating MAIT cell subsets and clinical disease activity indices. Colour intensity indicates correlation strength and direction.


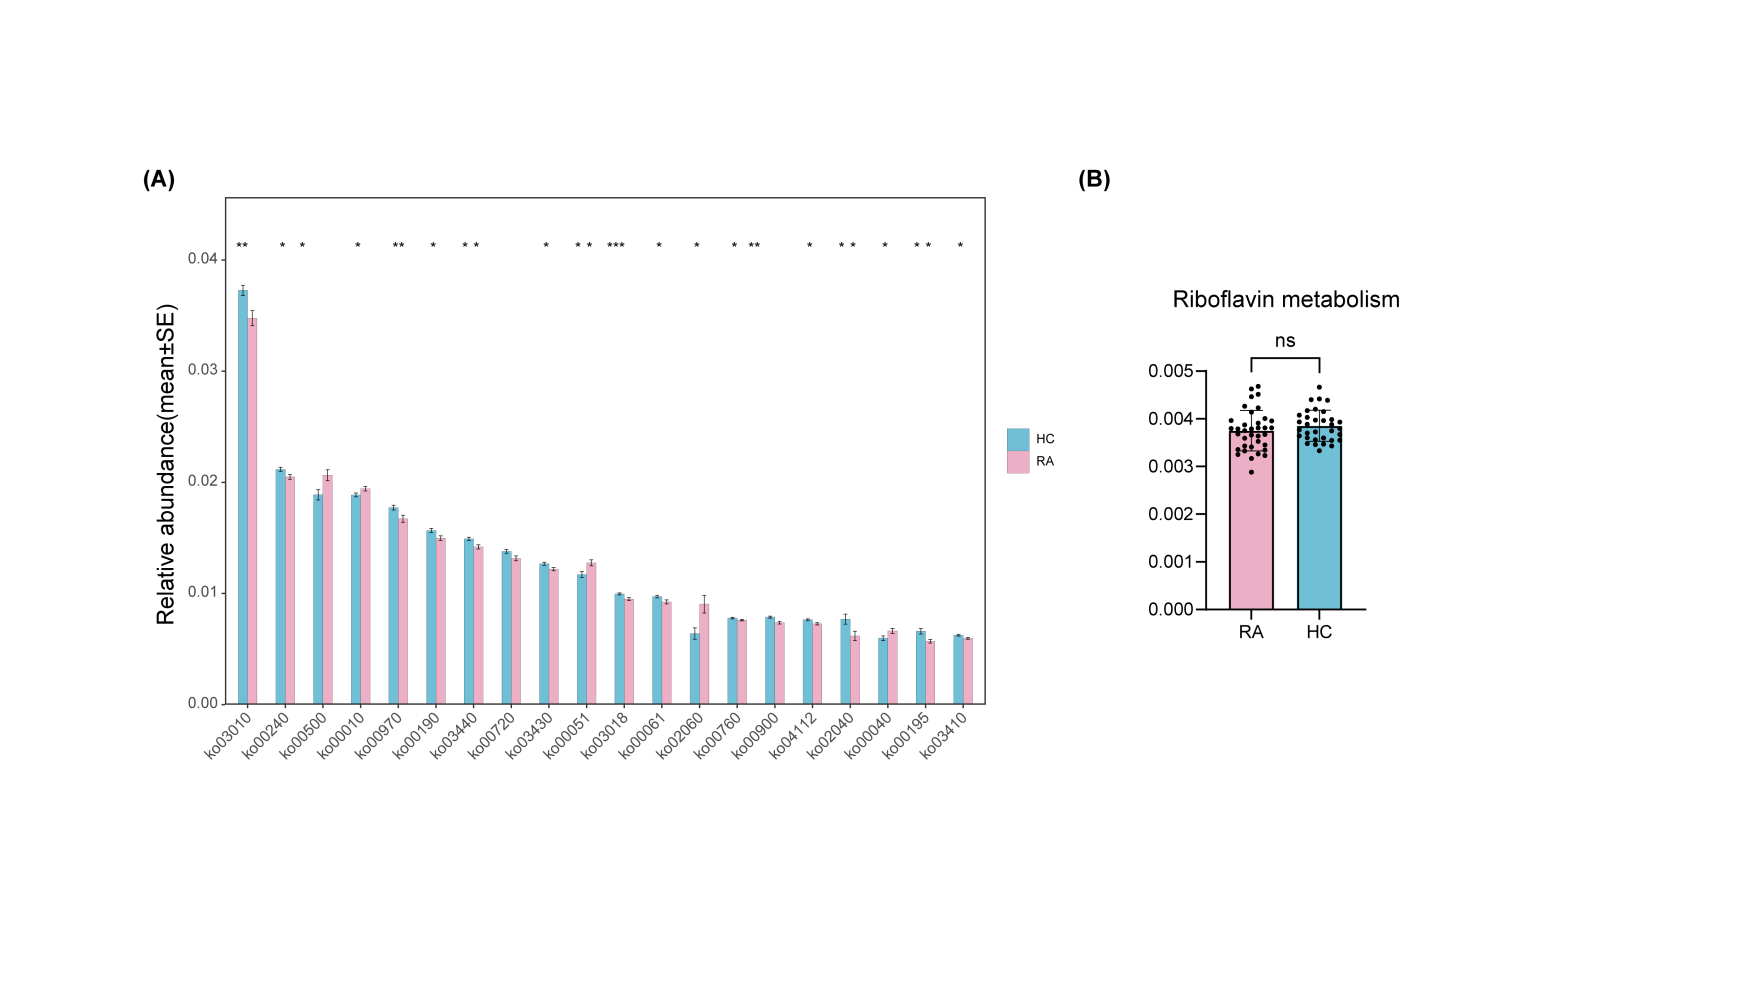


Supplementary Figure 3 Additional analyses of gut microbiota alterations in patients with RA. (A) Relative abundances of selected bacterial taxa showing differences between RA patients and HCs. (B) Extended analysis of differential taxa identified by LEfSe. (C) Heatmap illustrating the distribution patterns of representative genera across samples. Group comparisons were performed using non-parametric tests as appropriate. These findings further support the compositional alterations observed in Figure 3.


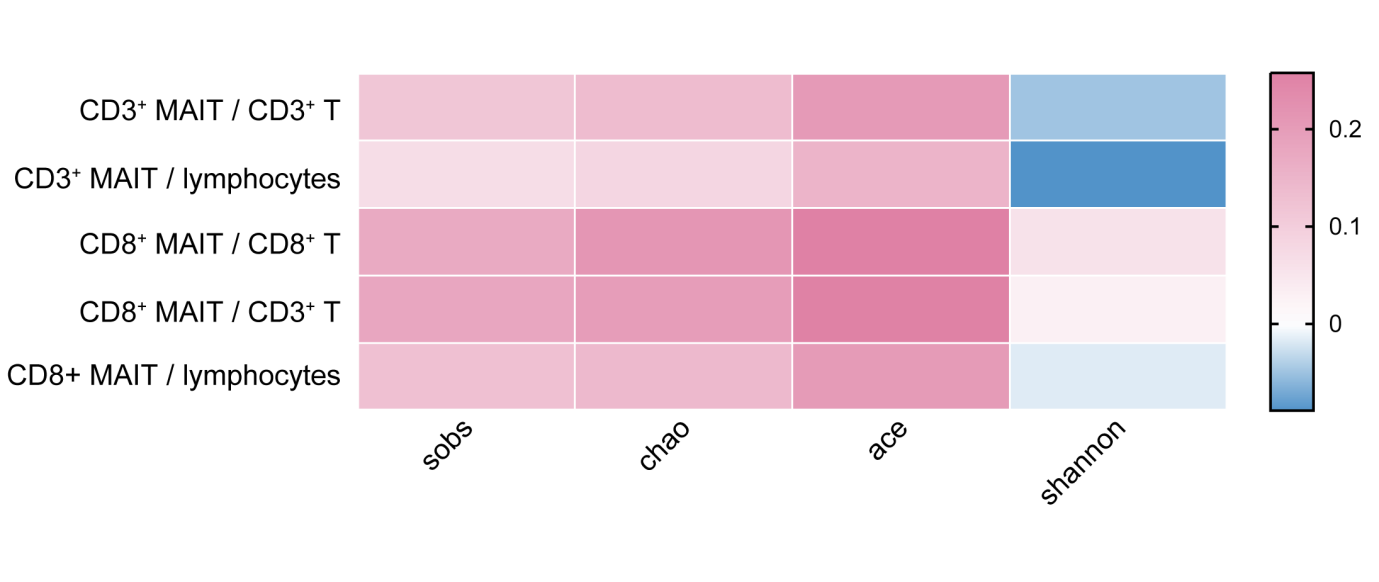


Supplementary Figure 4 Correlations between gut microbial α-diversity indices and circulating MAIT cell subsets. Heatmap showing Spearman correlation coefficients (r) between microbial α-diversity indices (Sobs, ACE, Chao1, and Shannon) and circulating MAIT cell subsets, including CD3+ MAIT / CD3+ T cells, CD3+ MAIT / lymphocytes, CD8+ MAIT / CD8+ T cells, CD8+ MAIT / CD3+ T cells, and CD8+  MAIT / lymphocytes.
